# Supplementary material for: Comprehensive Analysis of MAGE-A10 in Pan-Cancer and Its Validation in Gastric Cancer
Source: Research Square preprint supplement (doi:10.21203/rs.3.rs-5084638/v1), 2025-03-27
Supplement: Supplementary file 1 [file 318e6265540ab284b763923c.docx]

**Supporting information**

**Unveiling the pan-cancer landscape of MAGE-A10 and its validation in gastric cancer: a comprehensive analysis**

**Yichen Yin12†,Baozhen Wang12†,Mingzhe Yang23†,Weidi Liu12，Anqi Wang23，Zhongting Lu1，Jing Chen23*****，Tao Li4***

1School of Medicine, Ningxia Medical University, Ningxia, China

2Key Laboratory of Fertility Preservation and Maintenance (Ningxia Medical University), Ministry of Education, Yinchuan 750004, China

3School of Basic Medical Sciences, Ningxia Medical University, Yinchuan, China

4Department of Surgical Oncology, Tumor Hospital, The General Hospital of Ningxia Medical University, Yinchuan, China

**†**These authors have contributed equally to this work

*** Correspondence:** Tao Li, MD. Department of Surgical Oncology, Tumor Hospital, The General Hospital of Ningxia Medical University, No. 804, Shengli South Street, Xingqing District, Yinchuan, China. Email: lit1979@163.com; Jing Chen, PhD. Key Laboratory of Fertility Preservation and Maintenance (Ningxia Medical University), Ministry of Education, Yinchuan 750004, China; School of Basic Medicine of Ningxia Medical University, 1160 Shengli Road, Yinchuan 750004, China. Email: 20040009@nxmu.edu.cn.

**Table of contents**

# 1. Supplementary tablesS3

**Supplementary Table 1. Abbreviations from the TCGA database for 33 cancers** **S3**

Supplementary Table 2. The relationship between methylation levels of eight CpG sites in the MAGE-A10 gene and cancer prognosis **S4**

# Supplementary Figures.S6

# Original Western Blot bandsS7

**Figure 11 C.S7**

**Figure 11 I.S7**

**Supplementary Figure 2.S8**

**Supplementary tables**

**Supplementary Table 1. Abbreviations from the TCGA database for 33 cancers**

| **Type** | **Description** |
| --- | --- |
| ACC | Adrenocortical carcinoma |
| BLCA | Bladder Urothelial Carcinoma |
| BRCA | Breast invasive carcinoma |
| CESC | Cervical squamous cell carcinoma and endocervical adenocarcinoma |
| CHOL | Cholangiocarcinoma |
| COAD | Colon adenocarcinoma |
| DLBC | Lymphoid Neoplasm Diffuse Large B-cell Lymphoma |
| ESCA | Esophageal carcinoma |
| GBM | Glioblastoma multiforme |
| HNSC | Head and Neck squamous cell carcinoma |
| KICH | Kidney Chromophobe |
| KIRC | Kidney renal clear cell carcinoma |
| KIRP | Kidney renal papillary cell carcinoma |
| LAML | Acute Myeloid Leukemia |
| LGG | Brain Lower Grade Glioma |
| LIHC | Liver hepatocellular carcinoma |
| LUAD | Lung adenocarcinoma |
| LUSC | Lung squamous cell carcinoma |
| MESO | Mesothelioma |
| OV | Ovarian serous cystadenocarcinoma |
| PAAD | Pancreatic adenocarcinoma |
| PCPG | Pheochromocytoma and Paraganglioma |
| PRAD | Prostate adenocarcinoma |
| READ | Rectum adenocarcinoma |
| SARC | Sarcoma |
| SKCM | Skin Cutaneous Melanoma |
| STAD | Stomach adenocarcinoma |
| TGCT | Testicular Germ Cell Tumors |
| THCA | Thyroid carcinoma |
| THYM | Thymoma |
| UCEC | Uterine Corpus Endometrial Carcinoma |
| UCS | Uterine Carcinosarcoma |
| UVM | Uveal Melanoma |

**Supplementary Table 2.** **The relationship between methylation levels of eight CpG sites in the MAGE-A10 gene and cancer prognosis**

| **Name** | **Cancer** | **HR** | **CI** | **P.value** | **UCSC**  **RefGene**  **Name** |
| --- | --- | --- | --- | --- | --- |
| cg25549519 | LAML | 0.568 | (0.357;0.905) | 0.017 | MAGEA10 |
| cg04950711 | ACC | 0.402 | (0.193;0.837) | 0.015 | MAGEA10 |
| cg05215305 | ACC | 0.401 | (0.184;0.875) | 0.022 | MAGEA10 |
| cg11852358 | ACC | 0.326 | (0.151;0.704) | 0.004 | MAGEA10 |
| cg19964192 | ACC | 0.309 | (0.139;0.687) | 0.004 | MAGEA10 |
| cg26982030 | ACC | 0.312 | (0.137;0.71) | 0.006 | MAGEA10 |
| cg04950711 | BLCA | 1.699 | (1.164;2.481) | 0.006 | MAGEA10 |
| cg05215305 | BLCA | 0.571 | (0.386;0.845) | 0.005 | MAGEA10 |
| cg13994408 | BLCA | 1.462 | (1.086;1.969) | 0.012 | MAGEA10 |
| cg04950711 | BRCA | 1.778 | (1.16;2.725) | 0.008 | MAGEA10 |
| cg05215305 | BRCA | 1.776 | (1.065;2.963) | 0.028 | MAGEA10 |
| cg11852358 | BRCA | 1.563 | (1.05;2.329) | 0.028 | MAGEA10 |
| cg13492609 | BRCA | 2.196 | (1.245;3.876) | 0.007 | MAGEA10 |
| cg25549519 | BRCA | 1.549 | (1.042;2.302) | 0.030 | MAGEA10 |
| cg04950711 | CESC | 0.557 | (0.349;0.889) | 0.014 | MAGEA10 |
| cg19964192 | CESC | 0.517 | (0.278;0.962) | 0.037 | MAGEA10 |
| cg25549519 | CESC | 0.588 | (0.358;0.966) | 0.036 | MAGEA10 |
| cg26982030 | CESC | 0.391 | (0.2;0.764) | 0.006 | MAGEA10 |
| cg04950711 | GBM | 1.642 | (1.029;2.618) | 0.037 | MAGEA10 |
| cg11852358 | HNSC | 0.704 | (0.522;0.95) | 0.022 | MAGEA10 |
| cg13492609 | HNSC | 0.737 | (0.548;0.991) | 0.043 | MAGEA10 |
| cg25549519 | KICH | 0.246 | (0.061;0.984) | 0.047 | MAGEA10 |
| cg11852358 | KIRC | 1.493 | (1.013;2.199) | 0.043 | MAGEA10 |
| cg25549519 | KIRC | 0.488 | (0.29;0.821) | 0.007 | MAGEA10 |
| cg26982030 | KIRC | 1.916 | (1.28;2.87) | 0.002 | MAGEA10 |
| cg13994408 | KIRP | 0.076 | (0.01;0.555) | 0.011 | MAGEA10 |
| cg25549519 | KIRP | 0.29 | (0.154;0.547) | 0.001 | MAGEA10 |
| cg26982030 | KIRP | 0.433 | (0.223;0.841) | 0.014 | MAGEA10 |
| cg04950711 | LGG | 0.557 | (0.381;0.814) | 0.003 | MAGEA10 |
| cg11852358 | LGG | 0.522 | (0.362;0.753) | 0.001 | MAGEA10 |
| cg13492609 | LGG | 0.538 | (0.375;0.774) | 0.001 | MAGEA10 |
| cg13994408 | LGG | 0.339 | (0.238;0.484) | 0.000 | MAGEA10 |
| cg25549519 | LGG | 0.526 | (0.331;0.835) | 0.006 | MAGEA10 |
| cg19964192 | LIHC | 0.543 | (0.376;0.784) | 0.001 | MAGEA10 |
| cg26982030 | LIHC | 0.591 | (0.418;0.838) | 0.003 | MAGEA10 |
| cg05215305 | LUSC | 0.661 | (0.455;0.96) | 0.030 | MAGEA10 |
| cg11852358 | MESO | 0.414 | (0.248;0.692) | 0.001 | MAGEA10 |
| cg13492609 | MESO | 0.389 | (0.216;0.7) | 0.002 | MAGEA10 |
| cg13994408 | MESO | 0.552 | (0.318;0.958) | 0.035 | MAGEA10 |
| cg25549519 | MESO | 0.523 | (0.291;0.941) | 0.031 | MAGEA10 |
| cg04950711 | PAAD | 0.618 | (0.413;0.924) | 0.019 | MAGEA10 |
| cg26982030 | PAAD | 1.76 | (1.176;2.632) | 0.006 | MAGEA10 |
| cg04950711 | SARC | 0.442 | (0.295;0.663) | 0.000 | MAGEA10 |
| cg05215305 | SARC | 0.632 | (0.413;0.968) | 0.035 | MAGEA10 |
| cg11852358 | SARC | 0.577 | (0.378;0.882) | 0.011 | MAGEA10 |
| cg13492609 | SARC | 0.608 | (0.408;0.906) | 0.015 | MAGEA10 |
| cg19964192 | SARC | 0.608 | (0.397;0.933) | 0.023 | MAGEA10 |
| cg25549519 | SARC | 0.556 | (0.363;0.852) | 0.007 | MAGEA10 |
| cg04950711 | SKCM | 0.695 | (0.503;0.96) | 0.027 | MAGEA10 |
| cg05215305 | SKCM | 0.74 | (0.551;0.994) | 0.046 | MAGEA10 |
| cg11852358 | SKCM | 0.711 | (0.516;0.98) | 0.037 | MAGEA10 |
| cg13492609 | SKCM | 0.631 | (0.472;0.842) | 0.002 | MAGEA10 |
| cg19964192 | SKCM | 0.703 | (0.539;0.916) | 0.009 | MAGEA10 |
| cg25549519 | SKCM | 0.676 | (0.504;0.907) | 0.009 | MAGEA10 |
| cg04950711 | UCEC | 0.572 | (0.356;0.918) | 0.020 | MAGEA10 |
| cg13492609 | UCEC | 0.559 | (0.352;0.888) | 0.014 | MAGEA10 |
| cg19964192 | UCEC | 0.506 | (0.272;0.94) | 0.031 | MAGEA10 |
| cg05215305 | UVM | 0.42 | (0.178;0.991) | 0.048 | MAGEA10 |
| cg19964192 | UVM | 0.411 | (0.174;0.971) | 0.043 | MAGEA10 |

**Supplementary Figures**

**Supplementary Figure 1**


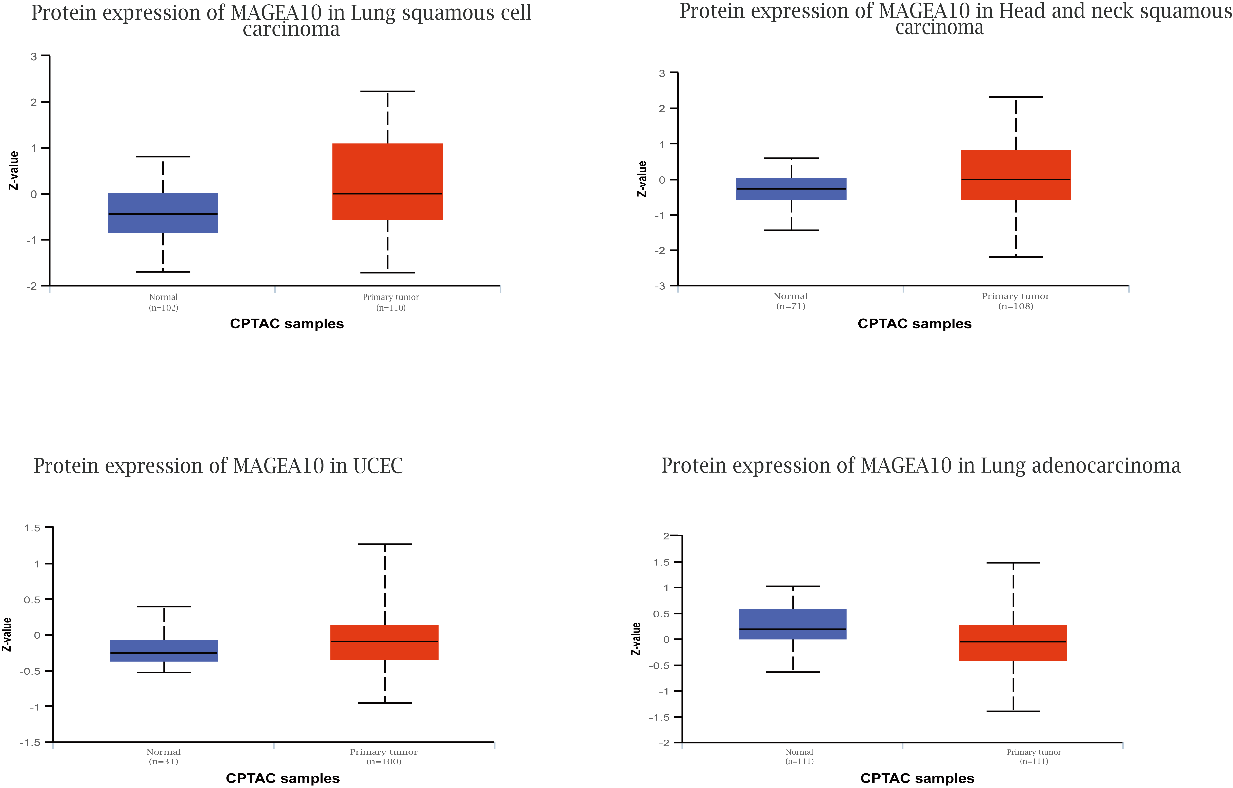


**Supplementary Figure 1.** Analysis of MAGE-A10 protein expression levels in various malignant tumors in the CPTAC database.

**Supplementary Figure 2**


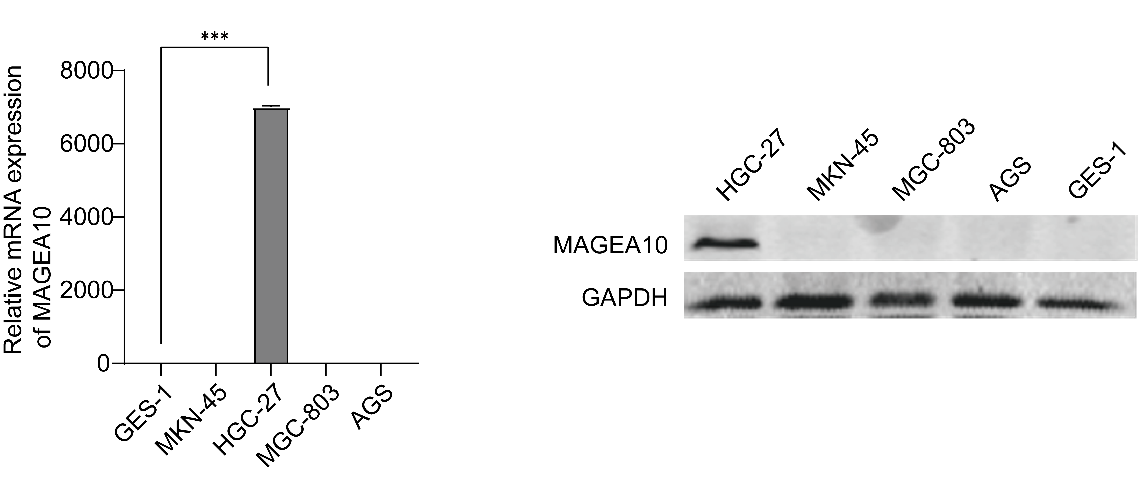


**Supplementary Figure 2.** RT-PCR and Western blot detection of MAGE-A10 expression in other gastric cancer cell lines (AGC, MGC-803, and MKN-45) and normal gastric cell line (GES-1).

**Original Western Blot bands**

**Figure11 C**

**
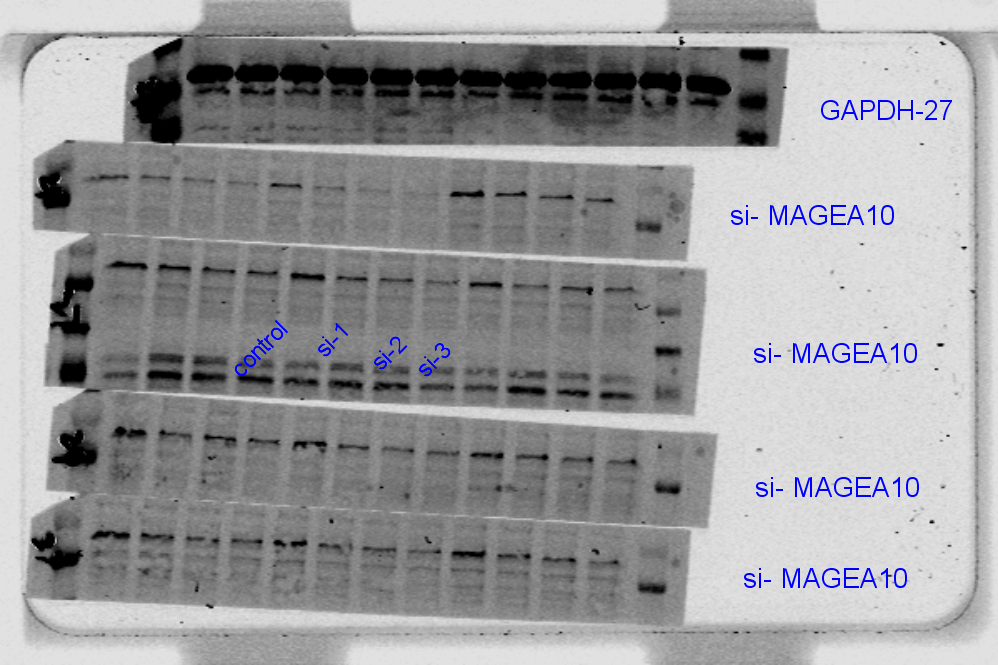
**

**
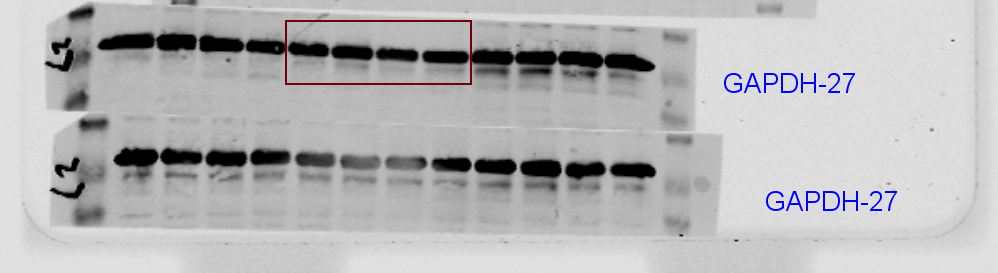
**

**Figure11 I**

**
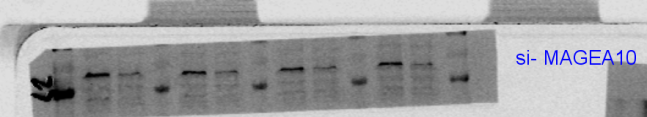
**

**
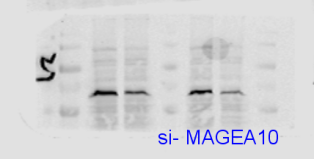
**

**
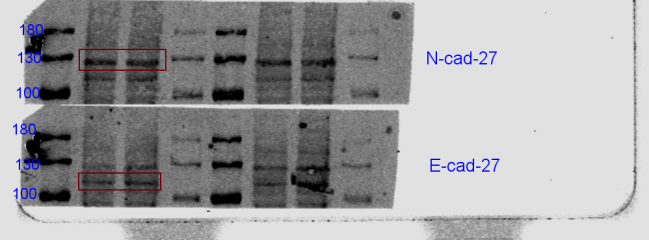
**

**
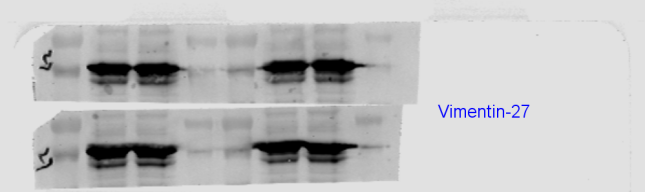
**

**
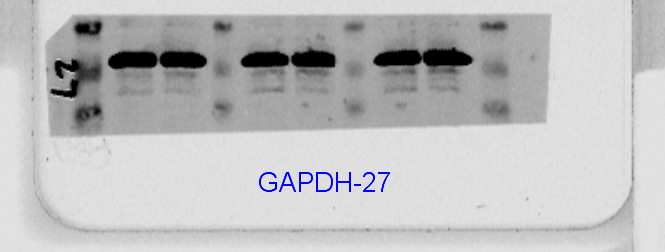
**

**Supplementary Figure 2**

**
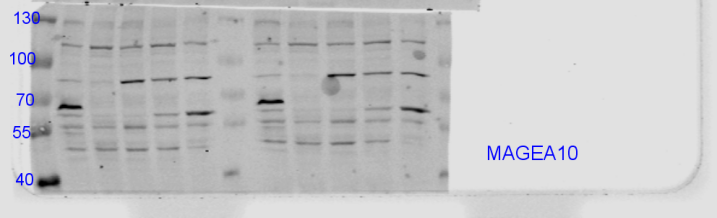
**

**
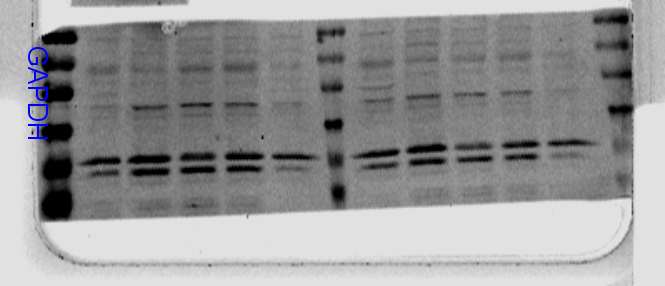
**
